# Supplementary material
Source: publisher figshare collection journal article supplement (https://acs.figshare.com/ndownloader/files/22483652)
Supplement: Supplementary file 1 [file 22483652]

# Design and Synthesis of Cyclometalated Iridium(III) Complex-Chromophore Hybrids that Exhibit Long- Emission Lifetimes Based on a REET (Reversible Electronic Energy Transfer) Mechanism

*Ayami Kazama,<sup>a</sup> Yuki Imai,<sup>b</sup> Yoshinori Okayasu,<sup>b</sup> Yasuyuki Yamada,<sup>c,d,e</sup> Junpei Yuasa,<sup>b</sup>  
and Shin Aoki<sup>a,f\*</sup>*

*<sup>a</sup>Faculty of Pharmaceutical Science, Tokyo University of Science,  
2641 Yamazaki, Noda, Chiba 278-8510, Japan,  
Phone no. +81-4-7121-3670*

*<sup>b</sup>Department of Applied Chemistry, Tokyo University of Science,  
1-3 Kagurazaka, Shinjuku-ku, Tokyo 162-8601, Japan,*

*<sup>c</sup>Department of Chemistry, Graduate School of Science, Nagoya University,  
Furo-cho, Chikusa-ku, Nagoya 464-8602, Japan*

*<sup>d</sup>Research Center for Materials Science, Nagoya University,  
Furo-cho, Chikusa-ku, Nagoya 464-8602, Japan*

*<sup>e</sup>JST, PRESTO, 4-1-8 Honcho, Kawaguchi, Saitama, 332-0012, Japan*

*<sup>f</sup>Research Institute for Science and Technology,  
Tokyo University of Science, 2641 Yamazaki, Noda, Chiba 278-8510, Japan*

\*Corresponding authors: E-mail, [shinaoki@rs.noda.tus.ac.jp](mailto:shinaoki@rs.noda.tus.ac.jp)

## Table of Contents

|                                                                                                                                      |            |
|--------------------------------------------------------------------------------------------------------------------------------------|------------|
| <b>Figure S1.</b> UV/vis absorption and emission spectra of <b>5</b> , <b>7</b> and <b>12a</b> .....                                 | <b>S3</b>  |
| <b>Figure S2.</b> Excitation spectra of <b>8-11</b> , <b>12a-c</b> , and <b>13</b> , <b>14</b> , <b>16</b> .....                     | <b>S4</b>  |
| <b>Figure S3.</b> (UV/vis absorption and emission spectra of <b>24b</b> and <b>26-28</b> .....                                       | <b>S5</b>  |
| <b>Table S1.</b> Photophysical properties of <b>24b</b> and <b>26-28</b> .....                                                       | <b>S5</b>  |
| <b>Figure S4.</b> UV/vis absorption and emission spectra of <b>12b</b> , <b>34</b> and a 1:3 mixture of <b>7</b> and <b>34</b> ..... | <b>S6</b>  |
| <b>Figure S5.</b> Emission spectra of <b>34</b> in different solvents and decay curve .....                                          | <b>S7</b>  |
| <b>Figure S6.</b> Emission decay curve of a 1:3 mixture of <b>7</b> and <b>34</b> .....                                              | <b>S7</b>  |
| <b>Figure S7.</b> Emission decay curve of <b>10</b> .....                                                                            | <b>S8</b>  |
| <b>Figure S8.</b> The triplet energy of Ir complex and chromophores.....                                                             | <b>S8</b>  |
| <b>Figure S9.</b> UV/vis absorption and emission spectra of <b>15</b> and <b>30</b> .....                                            | <b>S9</b>  |
| <b>Figure S10.</b> Emission decay curves and correlation graph of <b>12a</b> in different solvents .....                             | <b>S10</b> |
| <b>Figure S11.</b> Emission spectrum of <b>7</b> which is separated into two components .....                                        | <b>S11</b> |
| <b>Figure S12</b> Emission decay curve of <b>12a</b> after air bubbling. ....                                                        | <b>S12</b> |
| <b>Table S2.</b> Emission lifetime of <b>12a</b> after air bubbling .....                                                            | <b>S13</b> |
| <b>Figure S13.</b> UV/vis absorption and emission spectra of <b>12a</b> upon addition of aqueous HCl .....                           | <b>S13</b> |
| <b>Table S3.</b> Photophysical properties of <b>12a</b> upon addition of aqueous HCl .....                                           | <b>S14</b> |
| <b>Figure S14.</b> X-ray crystal structure of <b>37</b> .....                                                                        | <b>S14</b> |
| <b>Table S4.</b> Representative parameters for the X-ray crystal structure analyses of <b>37</b> .....                               | <b>S15</b> |
| <b>Figure S15.</b> UV/vis absorption and emission spectra <b>14</b> , <b>17</b> and <b>39</b> .....                                  | <b>S16</b> |
| <b>Figure S16</b> Emission decay curve and time-resolved emission of <b>17</b> .....                                                 | <b>S17</b> |
| <b>Figure S17.</b> Emission decay curve of <b>12a</b> in degassed DMSO .....                                                         | <b>S18</b> |
| <b>Figure S18.</b> Emission spectra and decay curve of <b>12a</b> and <b>16</b> . ....                                               | <b>S19</b> |

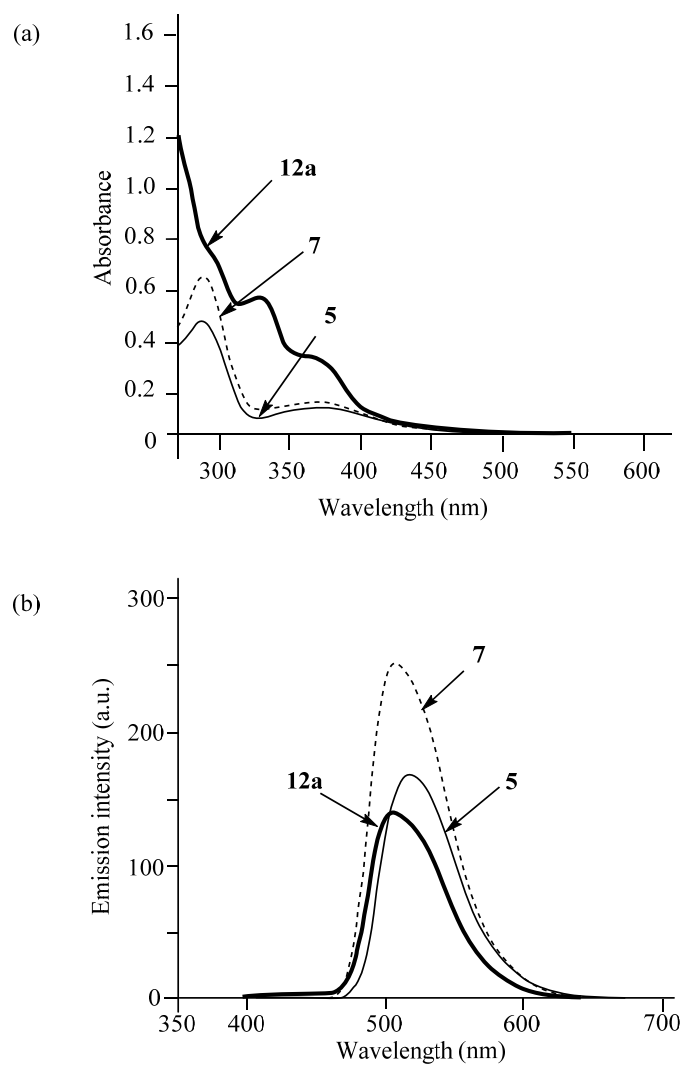

**Figure S1.** (a) UV/vis absorption spectra of **5**, **7**, and **12a** (10  $\mu$ M) in degassed DMSO at 298 K. (b) Emission spectra of **5**, **7**, and **12a** (10  $\mu$ M) in degassed DMSO at 298 K (excitation at 366 nm).

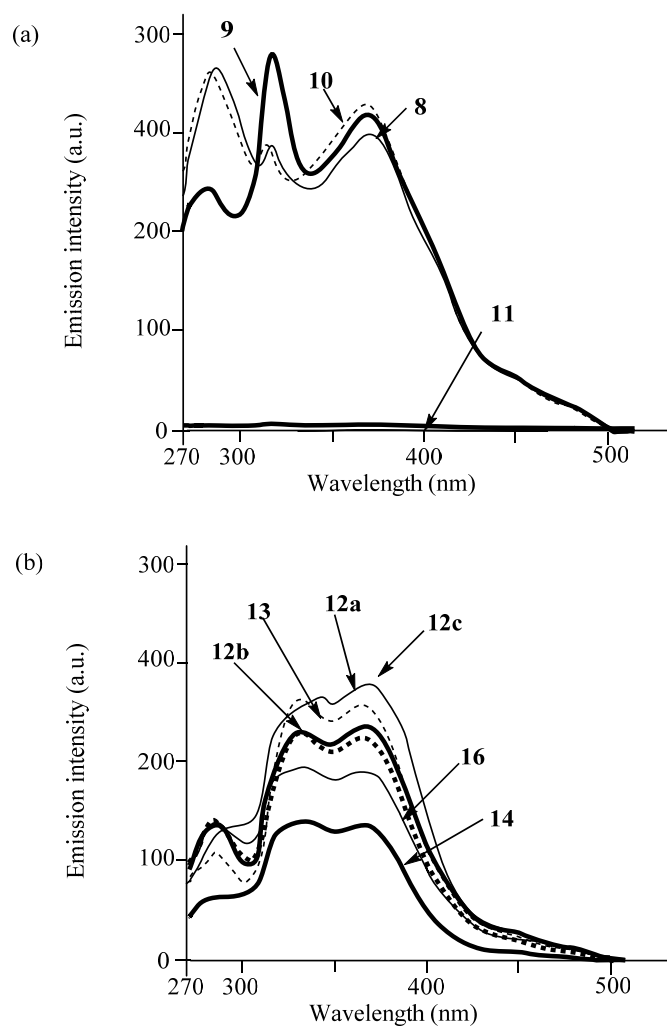

**Figure S2.** Excitation spectra of (a) **8-11** and (b) **12a-c**, **13-14**, and **16** (10  $\mu\text{M}$ ) in degassed DMSO at 298 K (emission at 500 nm).

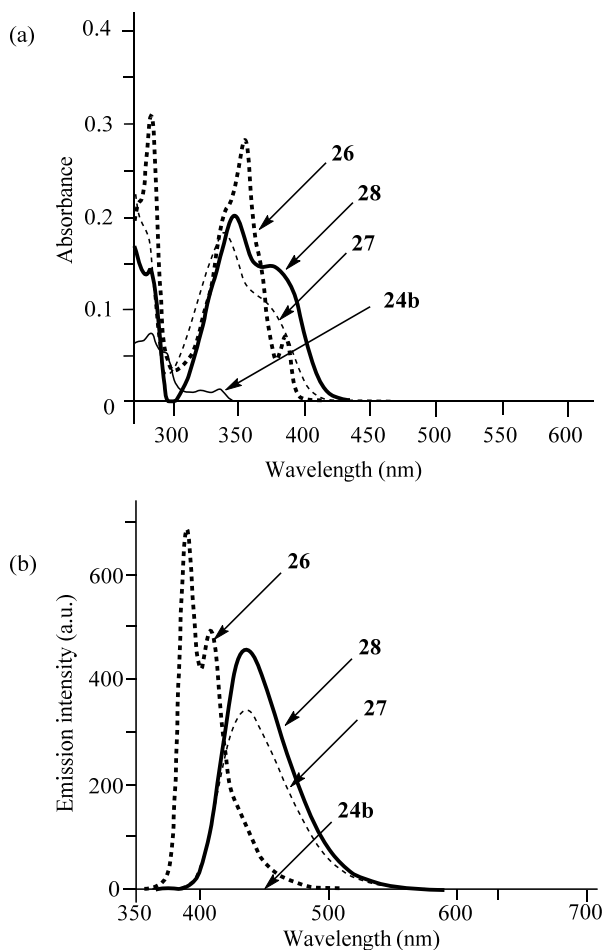

**Figure S3.** (a) UV/vis absorption spectra of **24b** (plain curve), **26** (bold dashed curve), **27** (dashed curve) and **28** (bold curve) (10  $\mu\text{M}$ ) in DMSO at 298 K. (b) Luminescence (fluorescence) emission spectra of **24b** (plain curve), **26** (bold dashed curve), **27** (dashed curve) and **28** (bold curve) (10  $\mu\text{M}$ ) in DMSO at 298 K. Excitation wavelength is 366 nm and a.u. denotes arbitrary units.

**Table S1.** Photophysical properties of **24b**, **26**, **27**, and **28** (10  $\mu\text{M}$ ) in degassed DMSO at 298 K.

| Compounds  | $\lambda_{\text{abs}}$ (nm) | $\lambda_{\text{em}}$ (nm) <sup>a</sup> | $\Phi^b$ |
|------------|-----------------------------|-----------------------------------------|----------|
| <b>24b</b> | 281, 319, 334               | -                                       | -        |
| <b>26</b>  | 282, 337, 352, 384          | 389, 410                                | 0.73     |
| <b>27</b>  | 277, 339, 373               | 436                                     | 0.57     |
| <b>28</b>  | 282, 346, 374               | 436                                     | 0.84     |

<sup>a</sup>excitation at 366 nm. <sup>b</sup>Quinine sulfate in 0.1 M  $\text{H}_2\text{SO}_4$  ( $\Phi = 0.55$ ) was used as a reference.

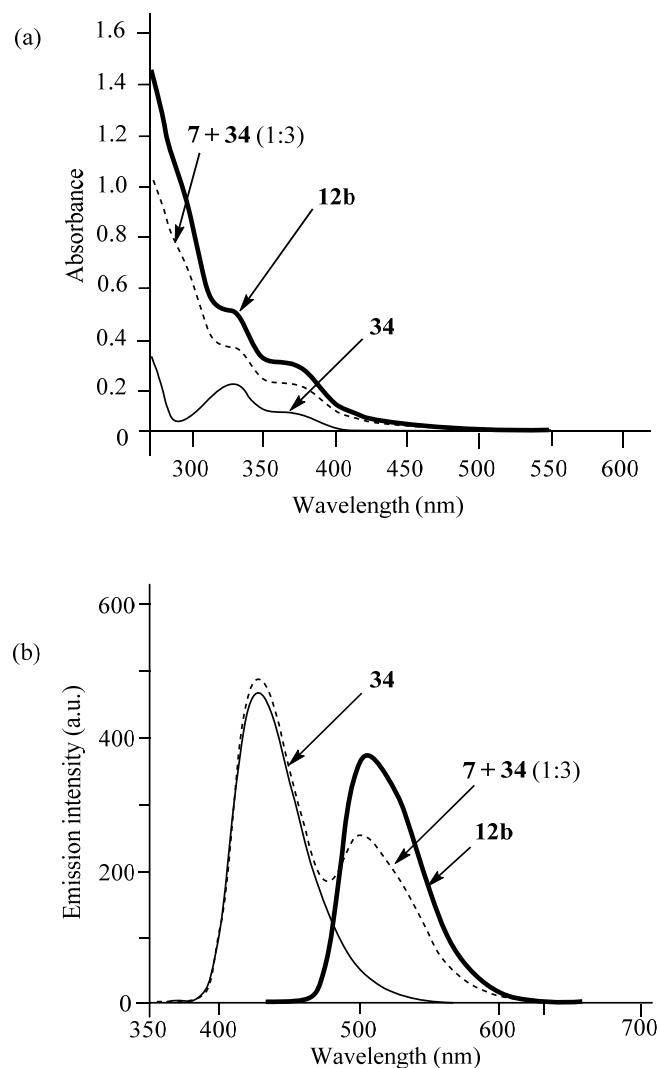

**Figure S4.** (a) UV/vis absorption spectra of **12b** (10  $\mu\text{M}$ ) (bold curve), **34** (30  $\mu\text{M}$ ) (solid curve) and a 1:3 mixture of **7** and **34** ( $[\text{7}] = 10 \mu\text{M}$  and  $[\text{34}] = 30 \mu\text{M}$ ) (dashed curve) in DMSO at 298 K. (b) Emission spectra of **12b** (10  $\mu\text{M}$ ) (bold curve), **34** (30  $\mu\text{M}$ ) (solid curve) and a 1:3 mixture of **7** and **34** ( $[\text{7}] = 10 \mu\text{M}$  and  $[\text{34}] = 30 \mu\text{M}$ ) (dashed curve) in degassed DMSO at 298 K (excitation at 366 nm).

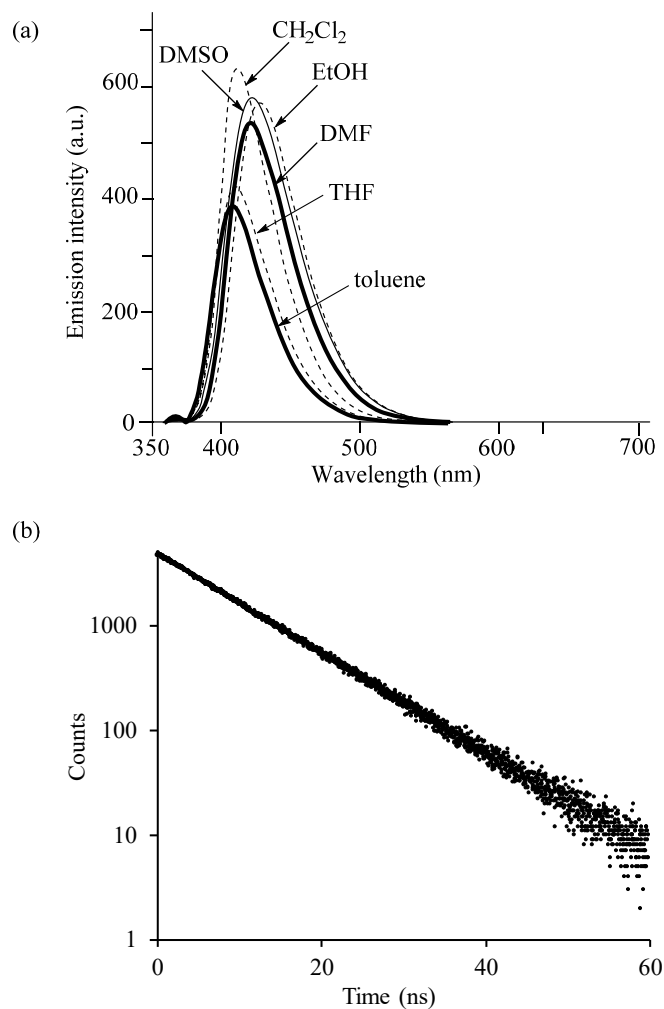

**Figure S5.** (a) Emission spectra of **34** (10  $\mu$ M) in different solvents at 298 K (excitation at 366 nm).  
 (b) Emission decay curve of **34** (10  $\mu$ M) at 430 nm in DMSO at 298 K (excitation at 371 nm).

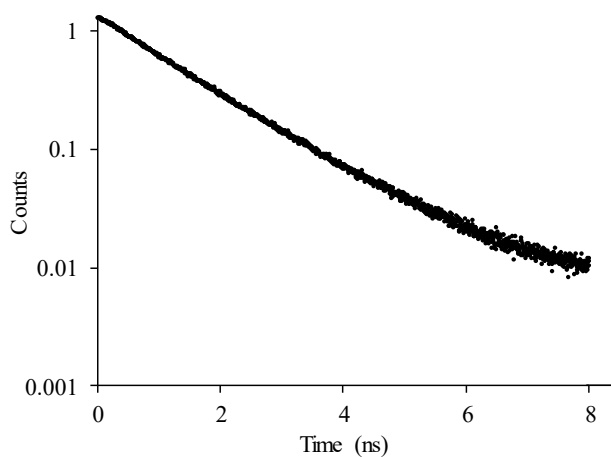

**Figure S6.** Emission decay curve of a 1:3 mixture of **7** and **34** ([**7**] = 10  $\mu$ M and [**34**] = 30  $\mu$ M) at > 475 nm in degassed DMSO at 298 K (excitation at 355 nm).

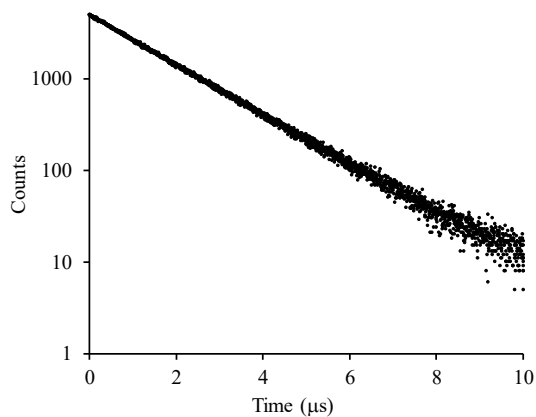

**Figure S7.** Emission decay curve of **10** (10  $\mu$ M) at 512 nm in degassed DMSO at 298 K (excitation at 371 nm).

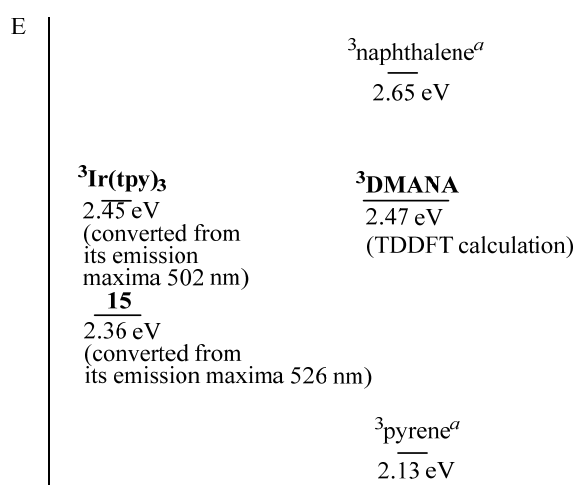

<sup>a</sup>The values of triplet energy from the reference described in the legend

**Figure S8.** The triplet energy of Ir complexes and chromophores (Ref.: Murov, S. L.; Carmichael, L.; Hug, G. L. *Handbook of Photochemistry*, 2nd Ed.; Marcel Dekker, Inc.: New York, 1993).



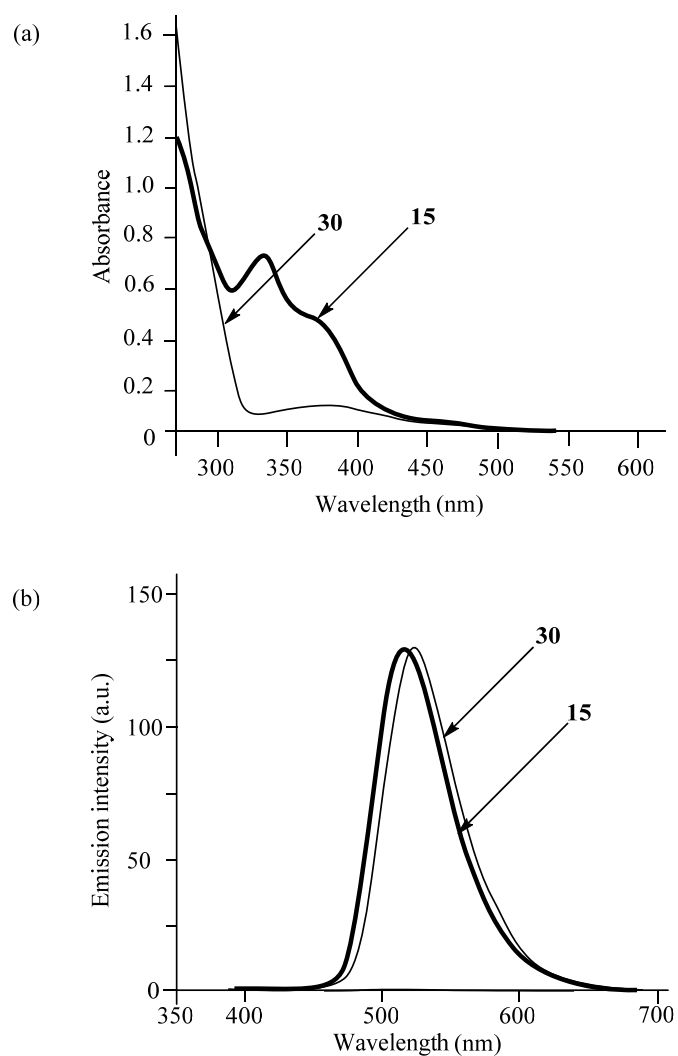

**Figure S9.** (a) UV/vis absorption spectra of **15** and **30** (10  $\mu$ M) in degassed DMSO at 298 K. (b) Emission spectra of **15** and **30** (10  $\mu$ M) in degassed DMSO at 298 K (excitation at 366 nm).

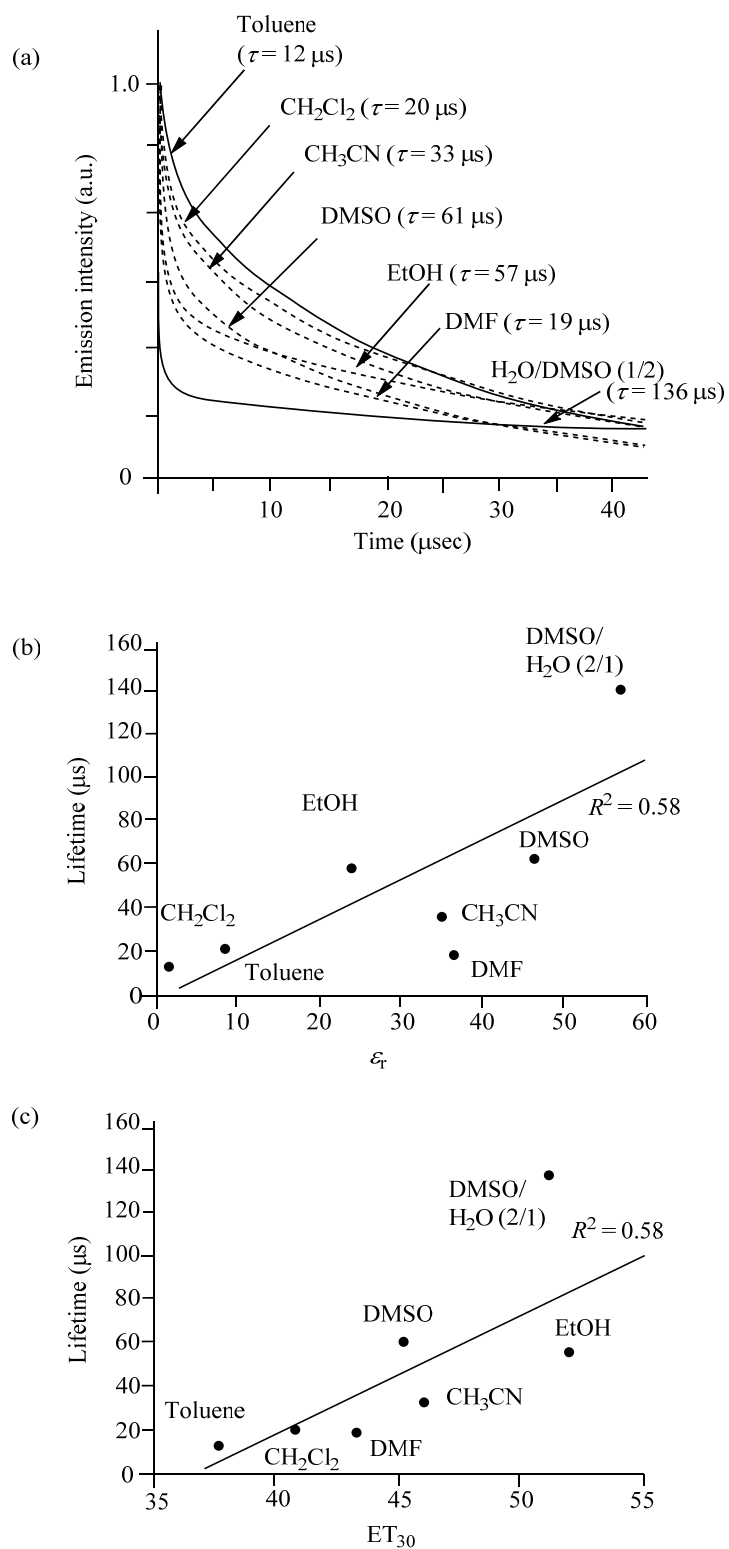

**Figure S10.** (a) Emission decay curves of **12a** (10 μM) at > 475 nm in degassed different solvents at 298 K (excitation at 366 nm). (b) Correlation between  $\epsilon_r$  values of the solvents and the lifetime of **12a**. (c) Correlation between ET<sub>30</sub> values of the solvents and the lifetime of **12a**.

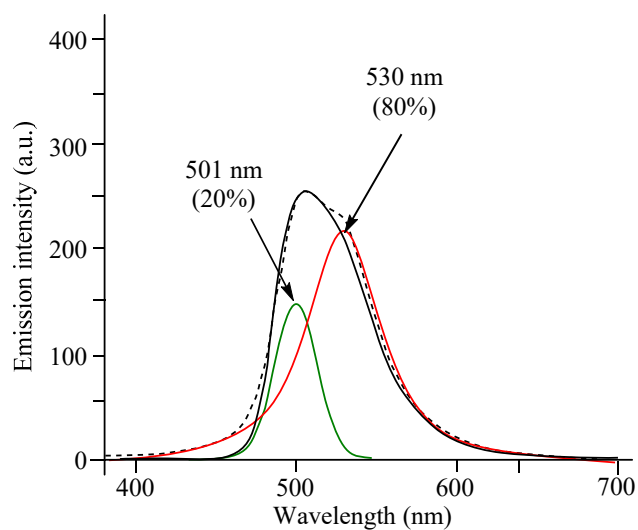

**Figure S11.** Observed emission spectrum of **7** (solid black curve) and its two deconvolution components having 501 nm (green curve) and 530 nm (red curve), respectively. The dashed curve is the reconstructed emission curve from the two component emission curves.

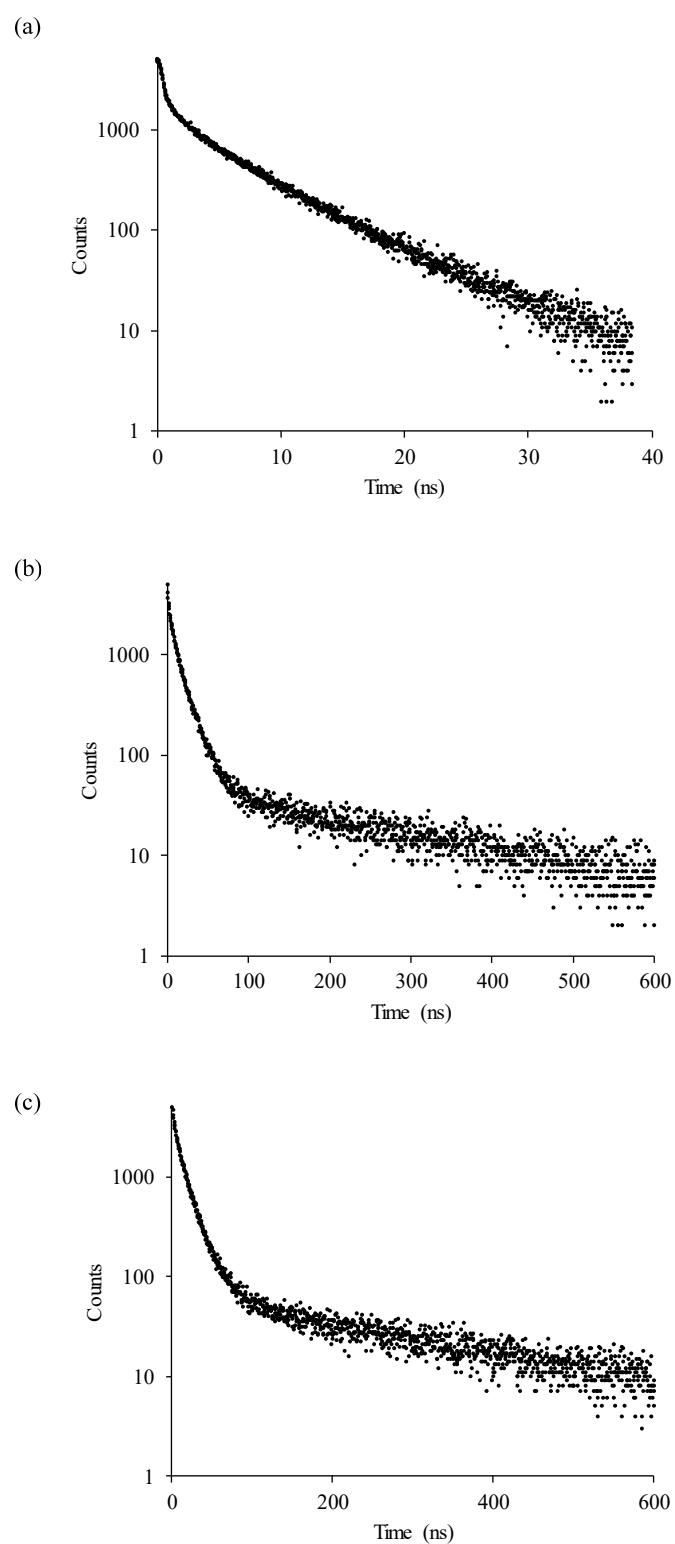

**Figure S12.** Emission decay curve of **12a** at 438 nm (a), at 495 nm (b), and at 507 nm (c) in DMSO at 298 K after bubbling air (excitation at 371 nm).

**Table S2.** Emission lifetime of **12a** (10  $\mu$ M) in DMSO at 298 K after bubbling air (excitation at 371 nm).

| Compound   | $\tau_{1/2}$ at 438 nm (ns) |                | $\tau_{1/2}$ at 495 nm (ns) |                |                | $\tau_{1/2}$ at 507 nm (ns) |                |                | $\tau_{1/2}$ ( $\mu$ s) |
|------------|-----------------------------|----------------|-----------------------------|----------------|----------------|-----------------------------|----------------|----------------|-------------------------|
|            | $\tau_{(ns)1}$              | $\tau_{(ns)2}$ | $\tau_{(ns)1}$              | $\tau_{(ns)2}$ | $\tau_{(ns)3}$ | $\tau_{(ns)1}$              | $\tau_{(ns)2}$ | $\tau_{(ns)3}$ |                         |
| <b>12a</b> | 1.8                         | 6.9            | 2.8                         | 15             | 282            | 2.2                         | 14             | 124            | –                       |

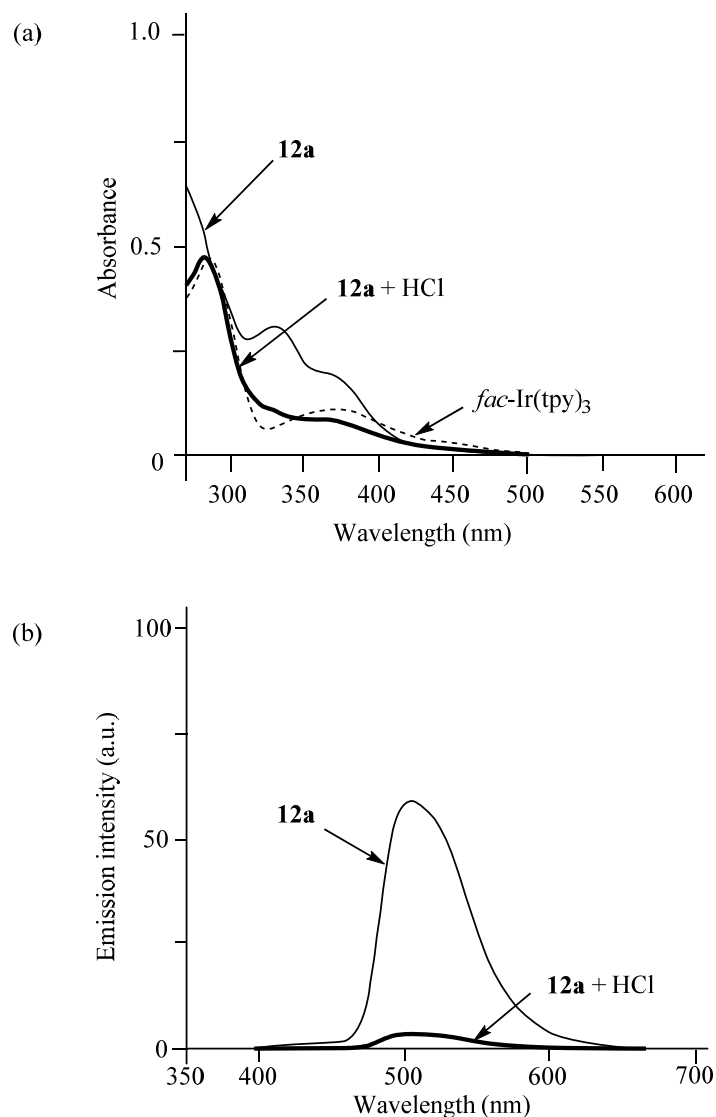

**Figure S13.** (a) UV/vis absorption spectra of *fac*-Ir(tpy)<sub>3</sub> (dashed curve) and **12a** (plain curve) (10  $\mu$ M) in degassed DMSO/H<sub>2</sub>O (2/1) solution and degassed DMSO/3 M aqueous HCl (2/1) solution (bold curve) at 298 K. (b) Emission spectra of **12a** (10  $\mu$ M) in degassed DMSO/H<sub>2</sub>O (2/1) solution (solid curve) and degassed DMSO/3 M aqueous HCl (2/1) solution (bold curve) at 298 K (excitation at 366 nm).

**Table S3.** Photophysical properties of **12a** (10  $\mu$ M) upon the protonation of the dimethylamino groups of DMANA moieties.

| Solvent                     | $\lambda_{\text{abs}}$ (nm) | $\lambda_{\text{em}}$ (nm) <sup>a</sup> | Emission lifetime <sup>b</sup> |
|-----------------------------|-----------------------------|-----------------------------------------|--------------------------------|
|                             |                             |                                         | $\tau_{(\mu\text{s})1}$        |
| DMSO/H <sub>2</sub> O (2/1) | 270, 295, 327, 364          | 433, 505                                | 136 $\mu$ s                    |
| DMSO/3 M aqueous HCl (2/1)  | 287, 373                    | 501                                     | 31 ns                          |

<sup>a</sup>excitation at 366 nm. <sup>b</sup>excitation at 355 nm.

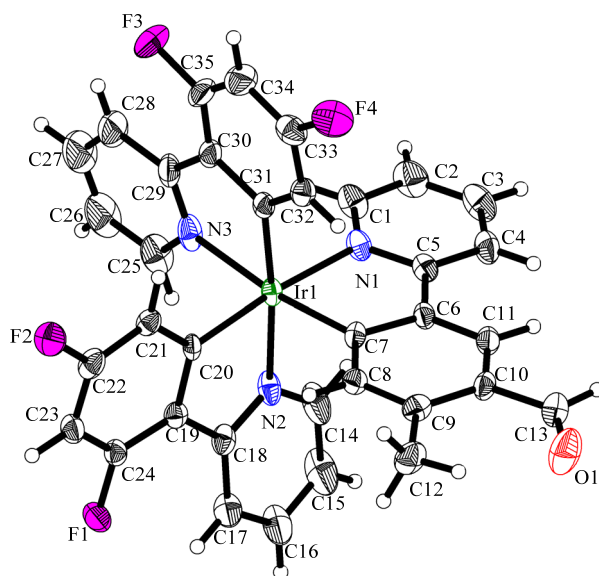

**Figure S14.** ORTEP drawing of single crystal structure of **37** with 50% probability ellipsoids.

**Table S4.** Crystal data and structure refinement for **37**.

|                                                     |                                                                                                                                     |
|-----------------------------------------------------|-------------------------------------------------------------------------------------------------------------------------------------|
| CCDC Deposition Number                              | 1978738                                                                                                                             |
| Empirical formula                                   | C <sub>35</sub> H <sub>22</sub> F <sub>4</sub> IrN <sub>3</sub> O                                                                   |
| Formula weight                                      | 768.79                                                                                                                              |
| Temperature                                         | 123 K                                                                                                                               |
| Wavelength                                          | 0.71075 Å                                                                                                                           |
| Crystal system                                      | Triclinic                                                                                                                           |
| Space group                                         | <i>P</i> −1                                                                                                                         |
| Unit cell dimensions                                | $a = 10.343(3)$ Å<br>$b = 11.858(4)$ Å<br>$c = 12.720(4)$ Å<br>$\alpha = 93.128(4)$<br>$\beta = 93.388(4)$<br>$\gamma = 104.051(5)$ |
| Volume                                              | 1506.9(8) Å <sup>3</sup>                                                                                                            |
| Z                                                   | 2                                                                                                                                   |
| Density (calcd.)                                    | 1.694 g·cm <sup>−3</sup>                                                                                                            |
| Absorption coefficient                              | 4.488 mm <sup>−1</sup>                                                                                                              |
| F(000)                                              | 748                                                                                                                                 |
| Crystal size                                        | 0.12 x 0.08 x 0.06 mm <sup>3</sup>                                                                                                  |
| Theta range for data collection                     | 3.3 to 27.5°                                                                                                                        |
| Index ranges                                        | −13 ≤ <i>h</i> ≤ 13 −15 ≤ <i>k</i> ≤ 12, −14 ≤ <i>l</i> ≤ 16                                                                        |
| Reflections collected                               | 11955                                                                                                                               |
| □ndependent reflections                             | 5217 [ <i>R</i> (int) = 0.1247]                                                                                                     |
| Completeness to theta = 27.480°                     | 95.1 %                                                                                                                              |
| Absorption correction                               | multi-scan                                                                                                                          |
| Max. and min. transmission                          | 0.851 and 1.000                                                                                                                     |
| Refinement method                                   | Full-matrix least-square on <i>F</i> <sup>2</sup>                                                                                   |
| Goodness-of-fit on <i>F</i> <sup>2</sup>            | 0.718                                                                                                                               |
| Final <i>R</i> indices [ <i>I</i> > 2σ( <i>I</i> )] | <i>R</i> <sub>1</sub> = 0.0279, <i>wR</i> <sub>2</sub> = 0.0835                                                                     |
| <i>R</i> indices (all data)                         | <i>R</i> <sub>1</sub> = 0.0308, <i>wR</i> <sub>2</sub> = 0.0879                                                                     |

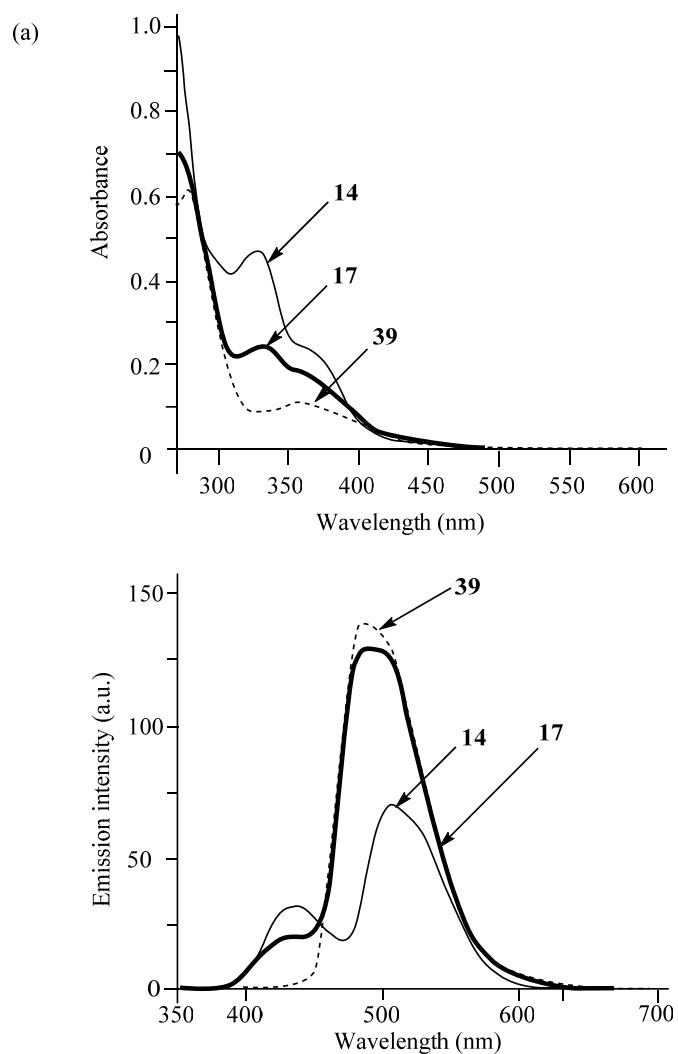

**Figure S15.** (a) UV/vis absorption spectra of **14** (plain curve), **17** (bold curve) and **39** (dashed curve) (10  $\mu$ M) in DMSO at 298 K. (b) Emission spectra of **14** (plain curve), **17** (bold curve) and **39** (dashed curve) (10  $\mu$ M) in degassed DMSO at 298 K (excitation at 366 nm).



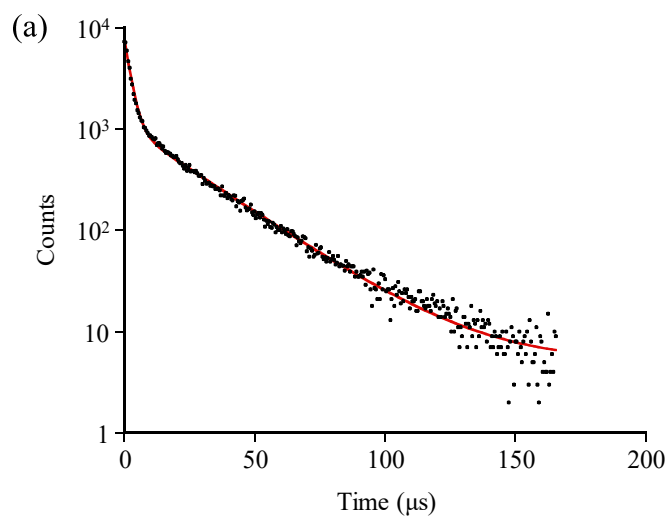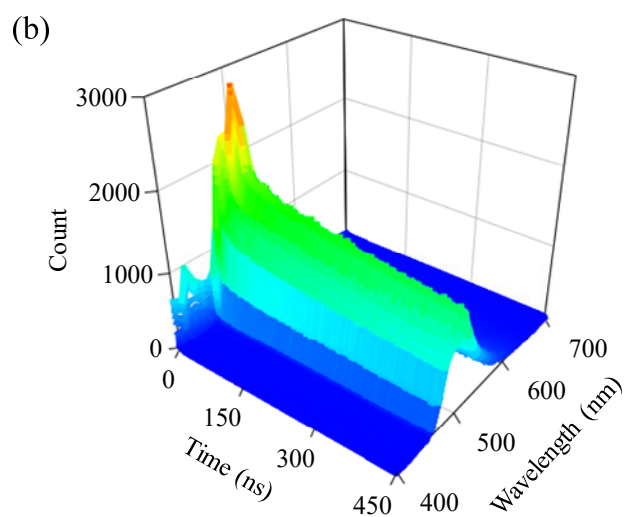

**Figure S16.** (a) An emission decay curve of **17** (10  $\mu\text{M}$ ) at 507 nm in degassed DMSO at 298 K (excitation at 371 nm). (b) Time-resolved emission spectra of **17** (10  $\mu\text{M}$ ). Excitation wavelength is 371 nm.

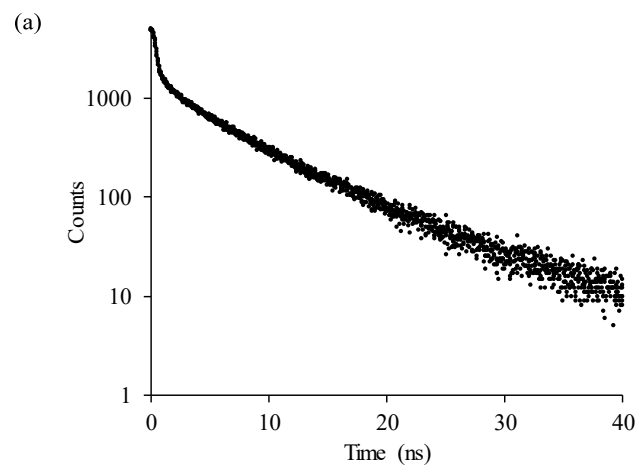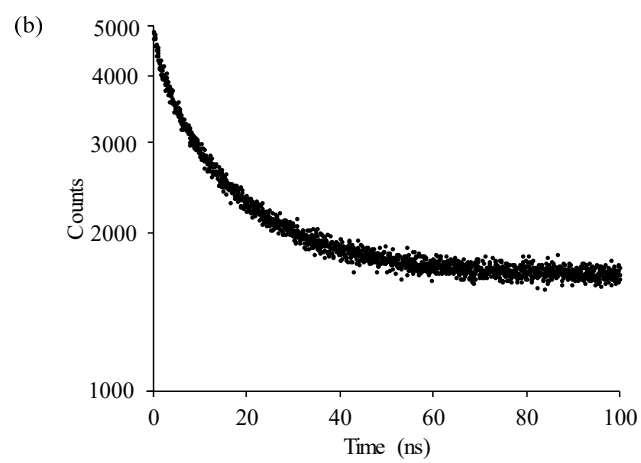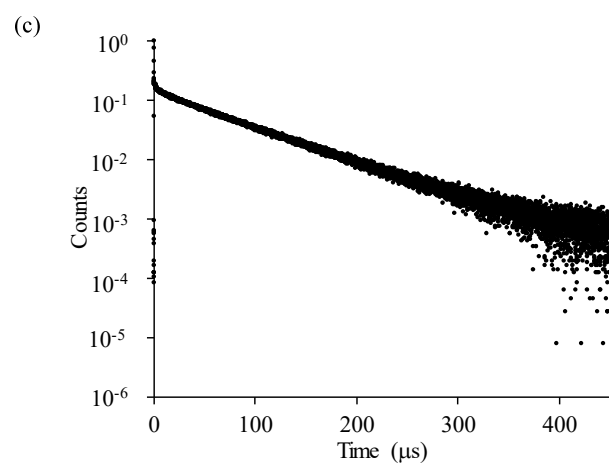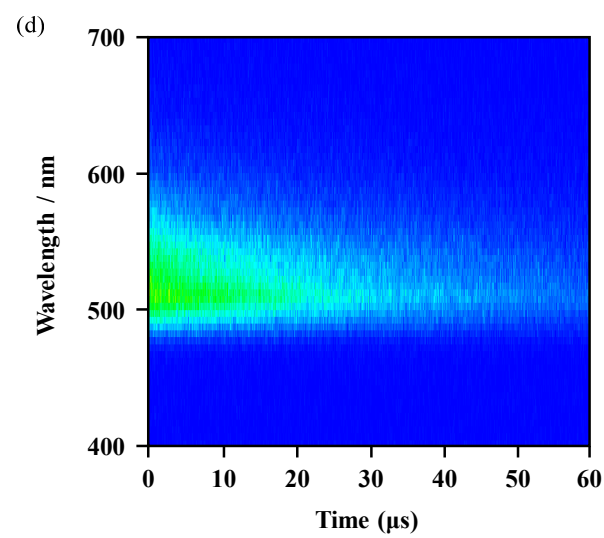

**Figure S17.** Emission decay curves of **12a** (10  $\mu\text{M}$ ) at 431 nm on a nanosecond scale (excitation at 371 nm) (a), at 512 nm on a nanosecond scale (excitation at 371 nm) (c) and at at  $> 475$  nm on a microsecond scale (excitation at 355 nm) (b) and in degassed DMSO at 298 K. (d) Time-resolved emission spectra of **12a** (10  $\mu\text{M}$ ). Excitation wavelength is 371 nm.

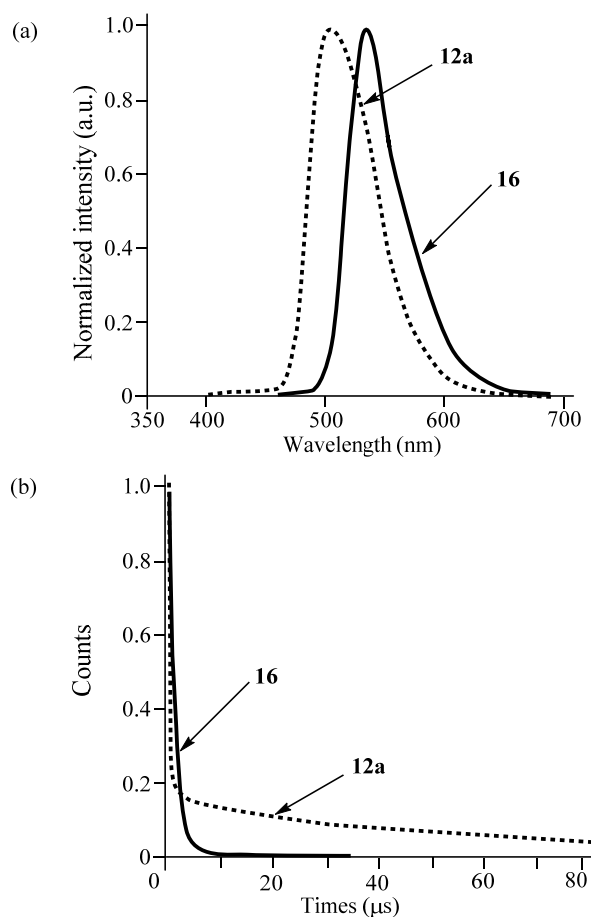

**Figure S18.** (a) Emission spectra of **12a** and **16** (10  $\mu\text{M}$ ) in DMSO at 298 K. (b) Emission decay curves of **12a** and **16** (10  $\mu\text{M}$ ) at  $> 475$  nm in degassed DMSO at 298 K.
